# Supplementary material for: Mechanochromic luminescent materials of bimetallic Cu(i) complexes showing thermally activated delayed fluorescence
Source: Royal Society of Chemistry journal article supplement (doi:10.1039/d0tc04607h), 2020-01-01
Supplement: d0tc04607h1.pdf [file d0tc04607h1.pdf]

## *Electronic Supplementary Information (ESI)*

### **Mechanochromic luminescent materials of bimetallic Cu(I) complexes showing thermally activated delayed fluorescence**

Xing-Wei Chen,<sup>‡a</sup> Li-Hua He,<sup>‡a</sup> Peng Ju,<sup>a</sup> Jing-Lin Chen,<sup>\*ab</sup> Sui-Jun Liu,<sup>a</sup> and He-Rui Wen<sup>a</sup>

<sup>a</sup> *Department of Materials, Metallurgy and Chemistry, Jiangxi University of Science and Technology, Ganzhou 341000, P.R. China*

<sup>b</sup> *State Key Laboratory of Structural Chemistry, Fujian Institute of Research on the Structure of Matter, Chinese Academy of Sciences, Fuzhou 350002, P.R. China*

---

\*Authors to whom correspondence should be addressed.

E-mail: gzchenjinglin@126.com (J.-L. Chen)

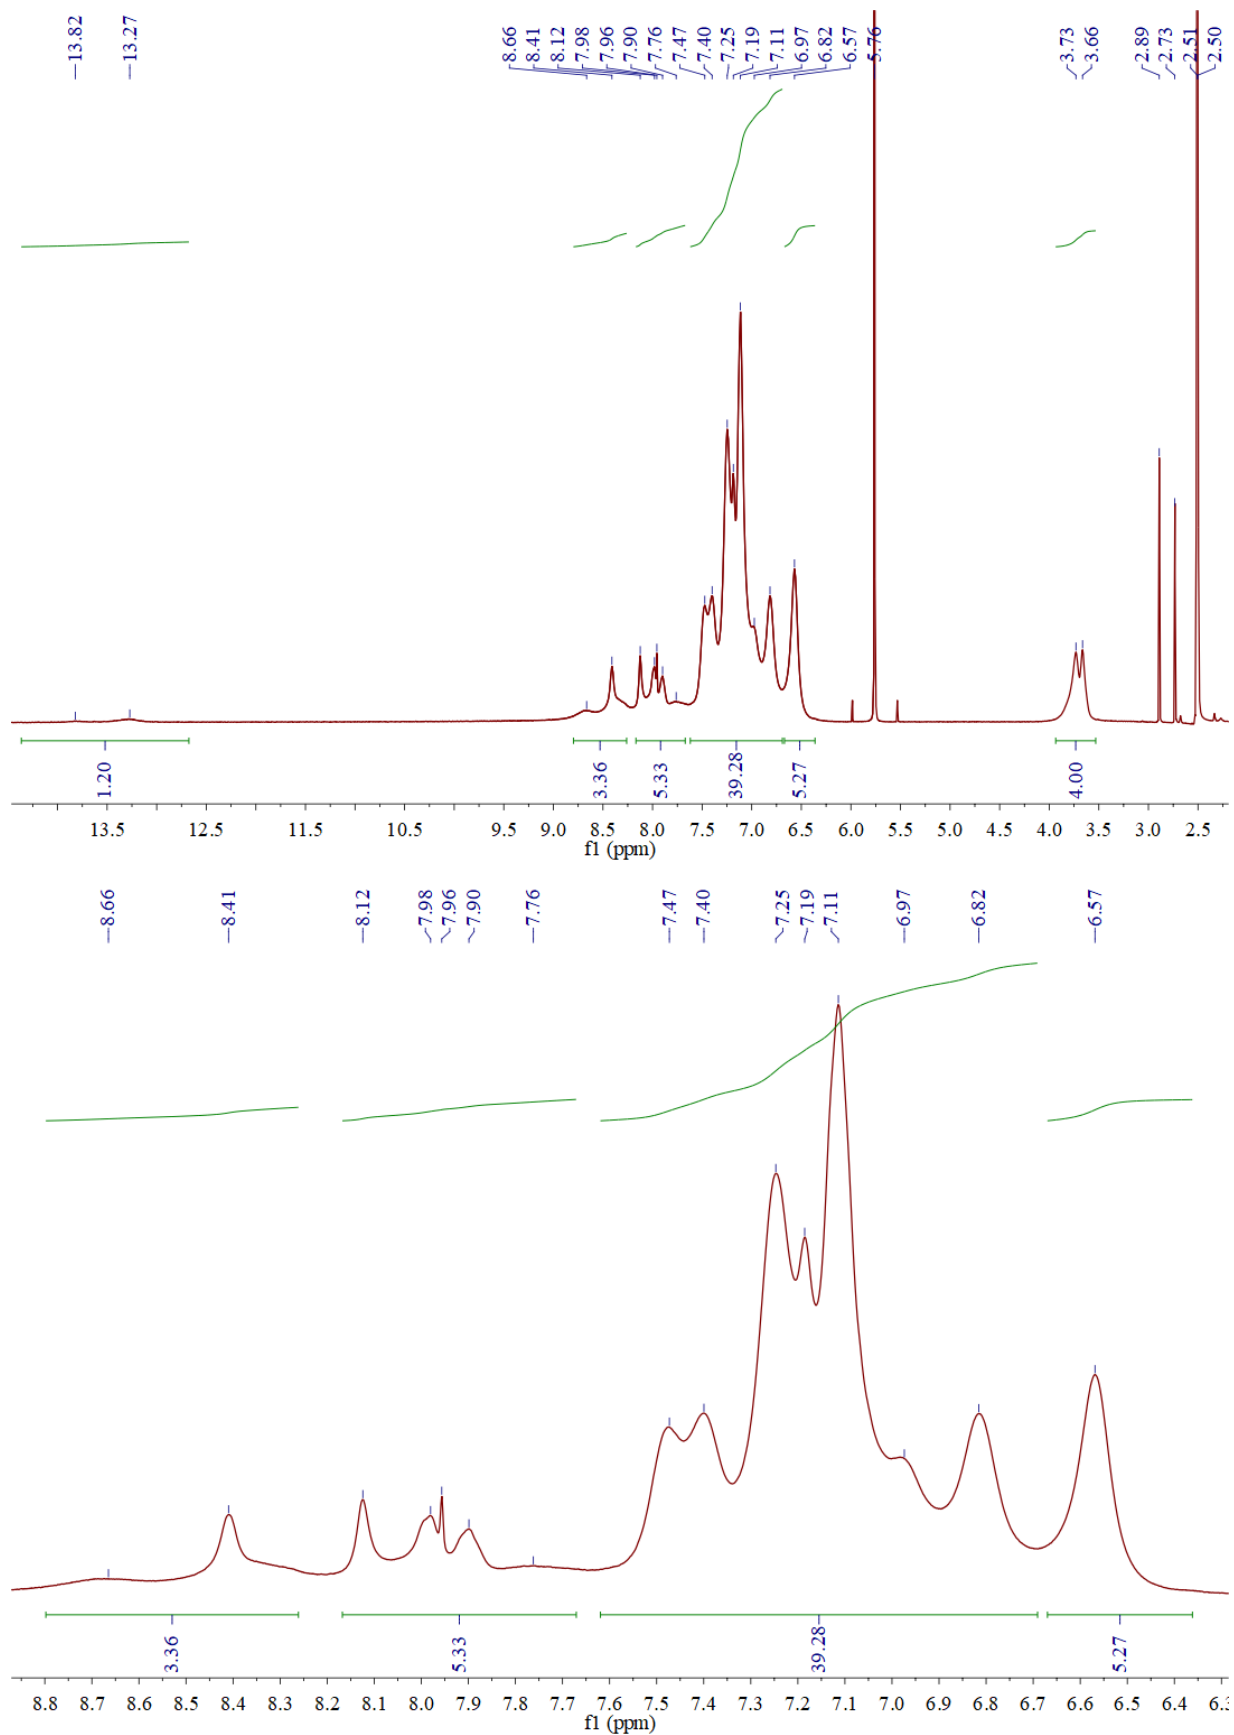

**Fig. S1**  $^1\text{H}$  NMR spectra of **1** in  $\text{DMSO-}d_6$ .

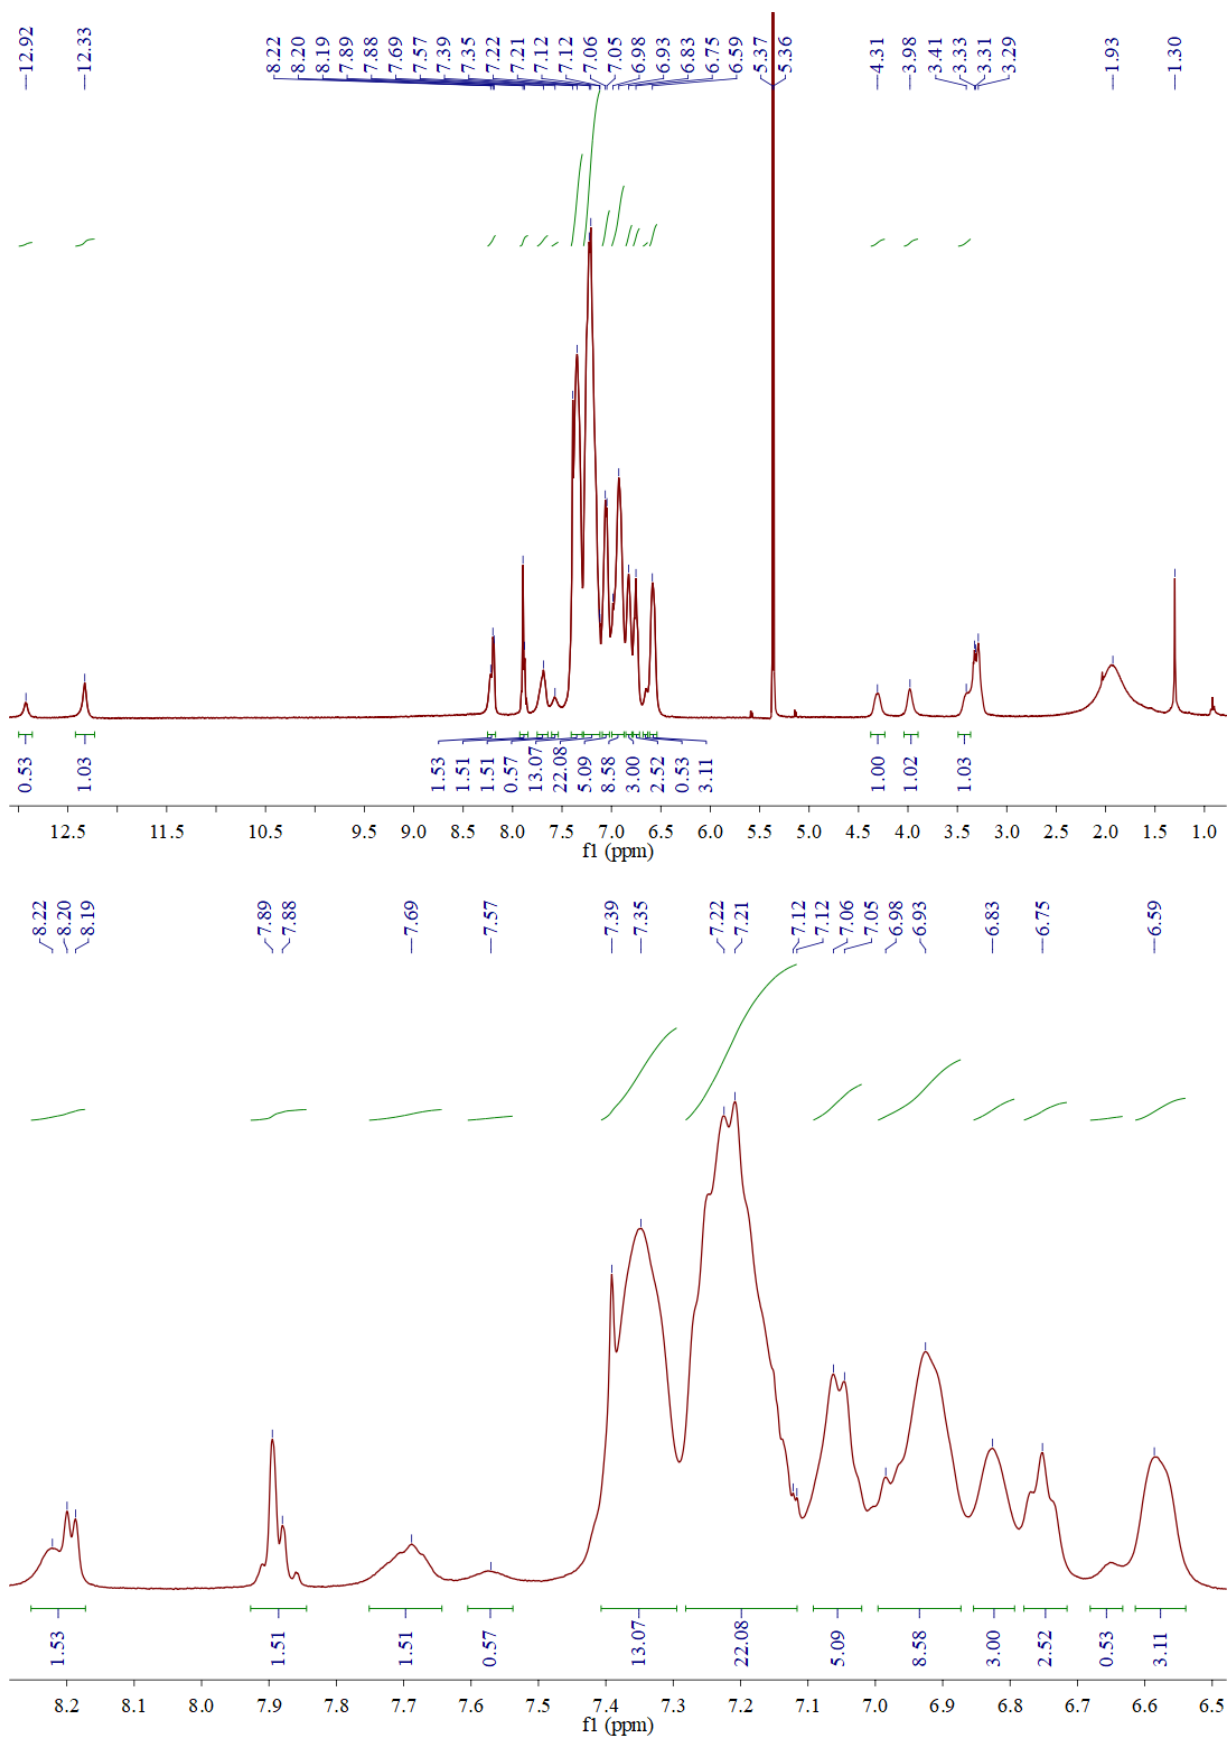

**Fig. S2**  $^1\text{H}$  NMR spectra of **2** in  $\text{CD}_2\text{Cl}_2$ .

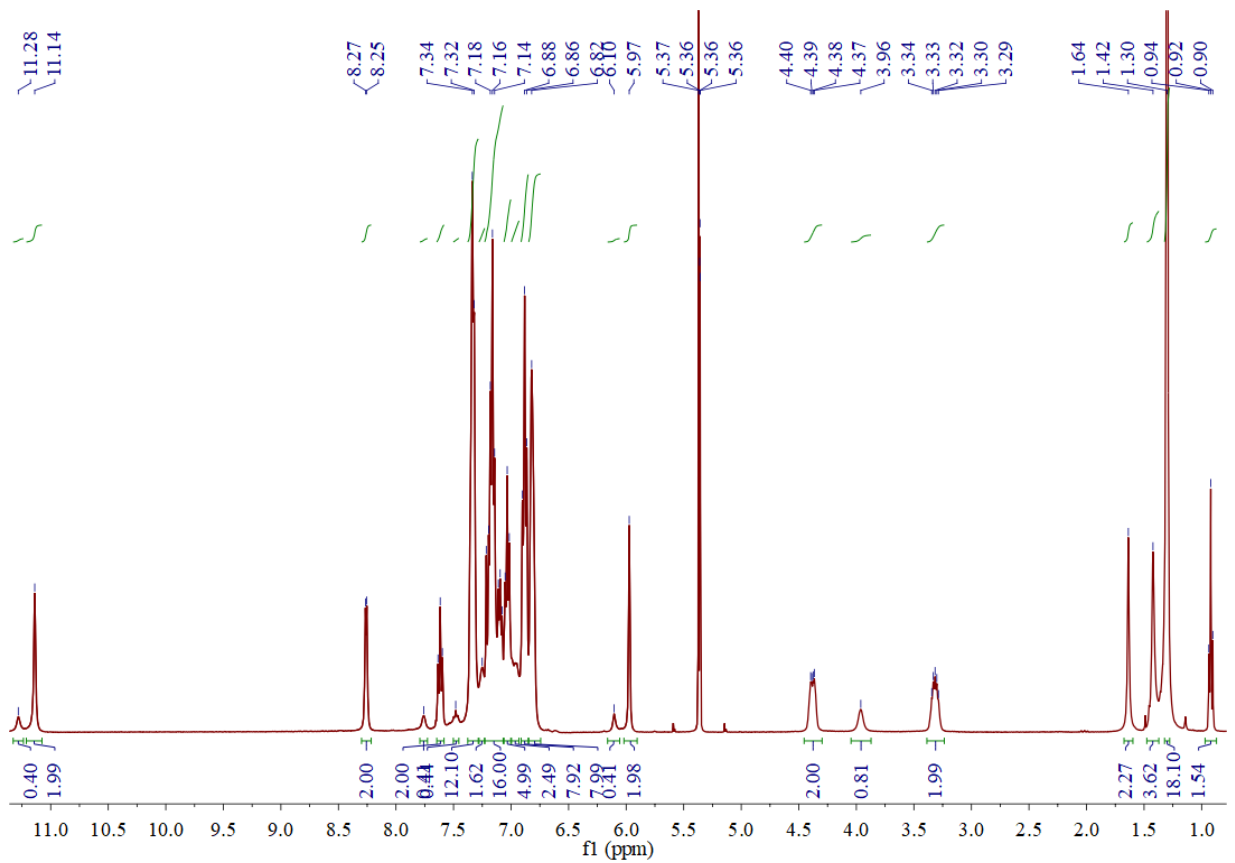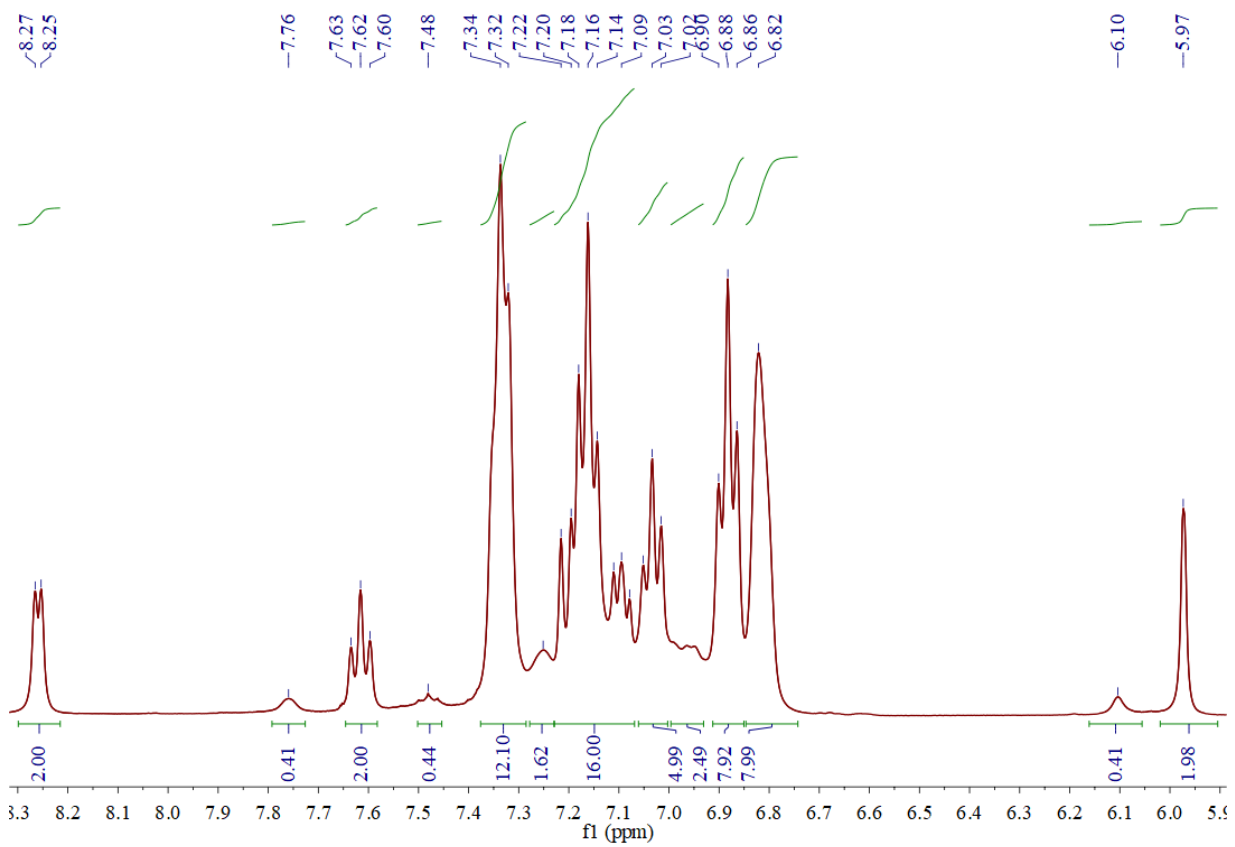

**Fig. S3**  $^1\text{H}$  NMR spectra of **3** in  $\text{CD}_2\text{Cl}_2$ .

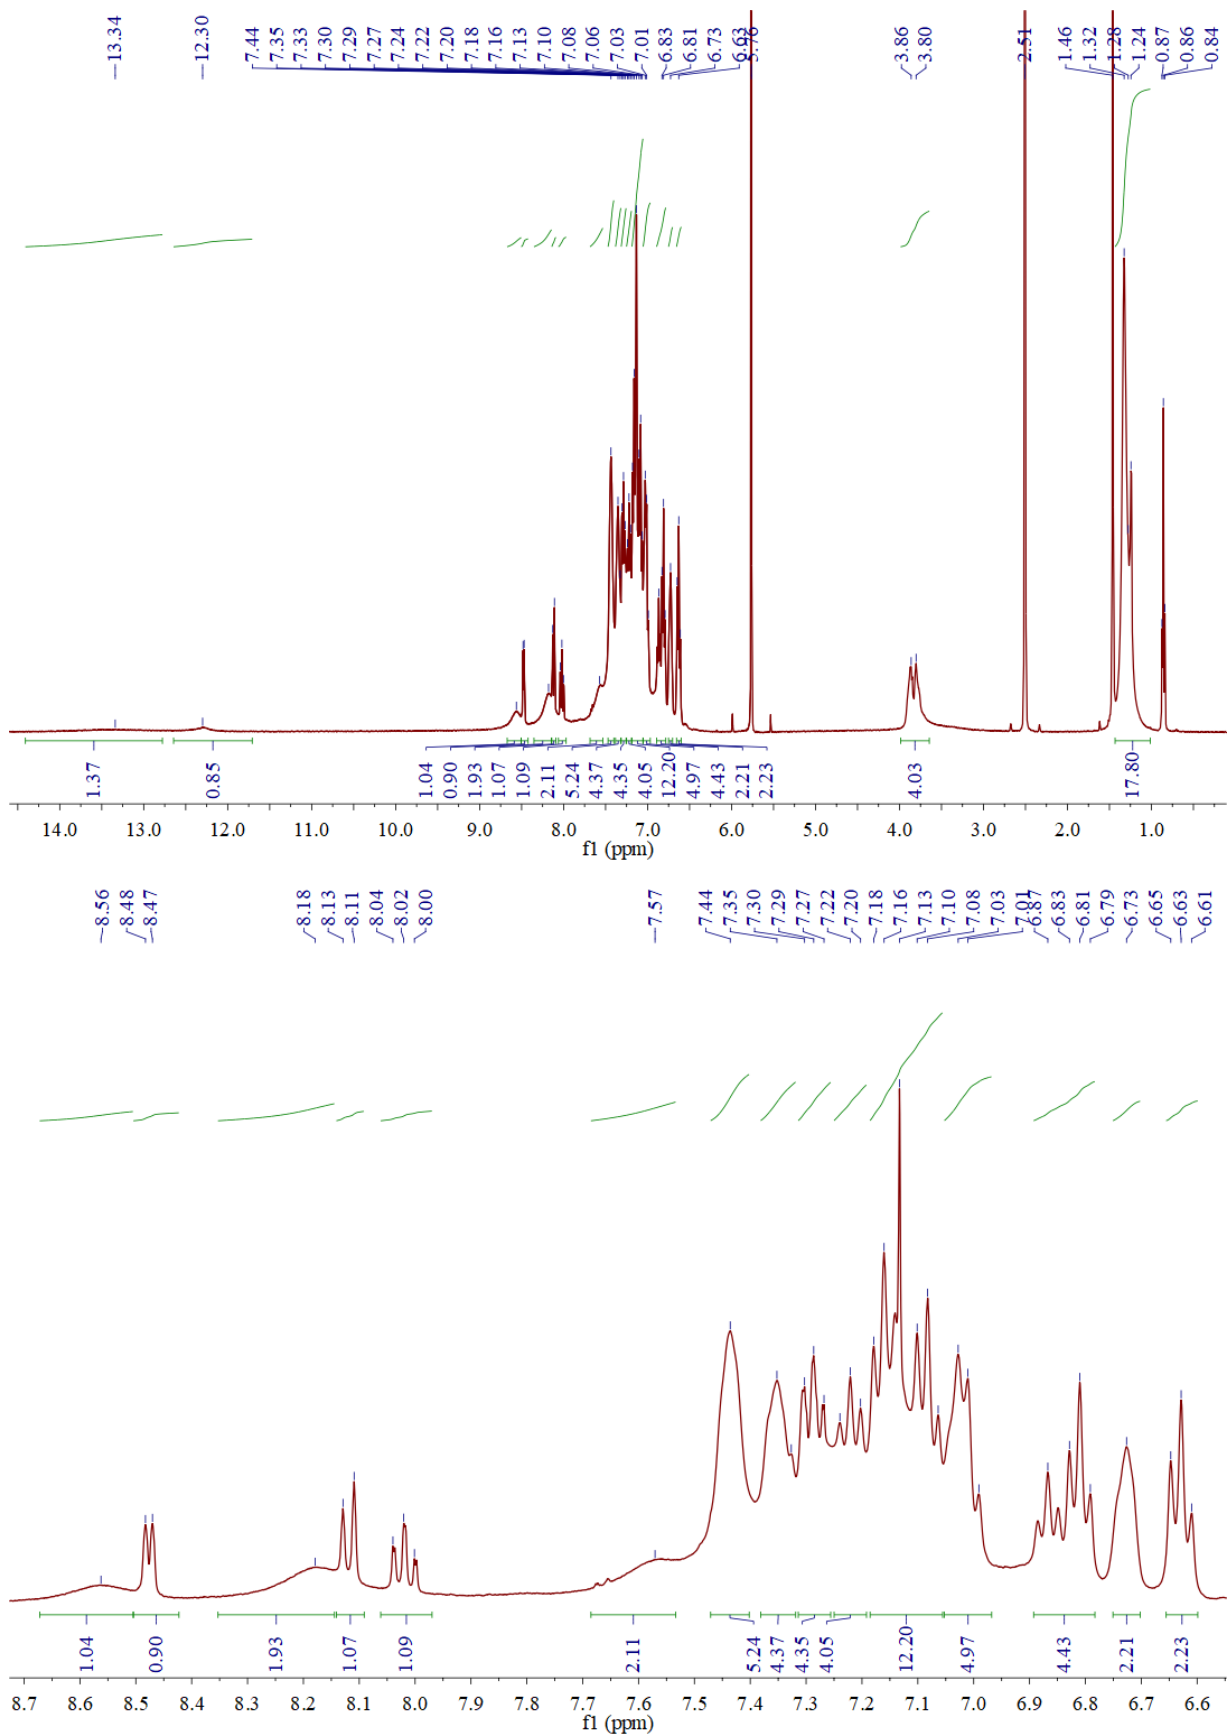

**Fig. S4**  $^1\text{H}$  NMR spectra of **3** in  $\text{DMSO-}d_6$ .

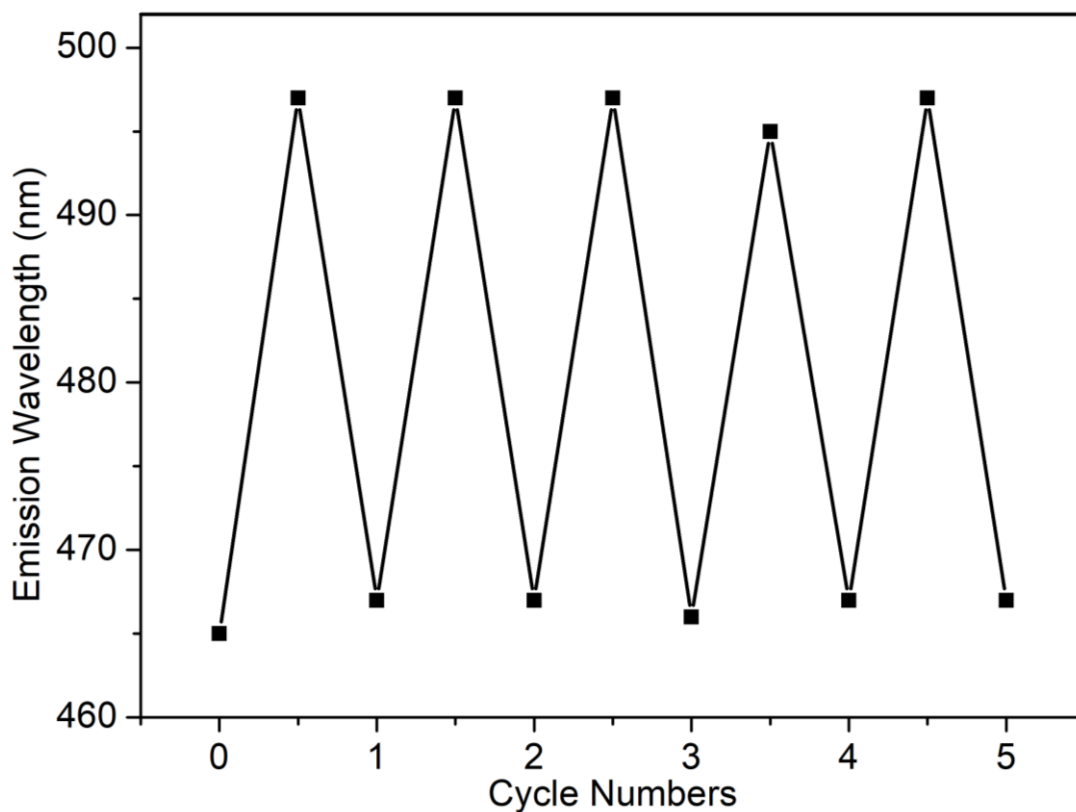

**Fig. S5** Emission maximum variation of **1** under alternate treatment of mechanical grinding and  $\text{CH}_2\text{Cl}_2$  vapor fuming.

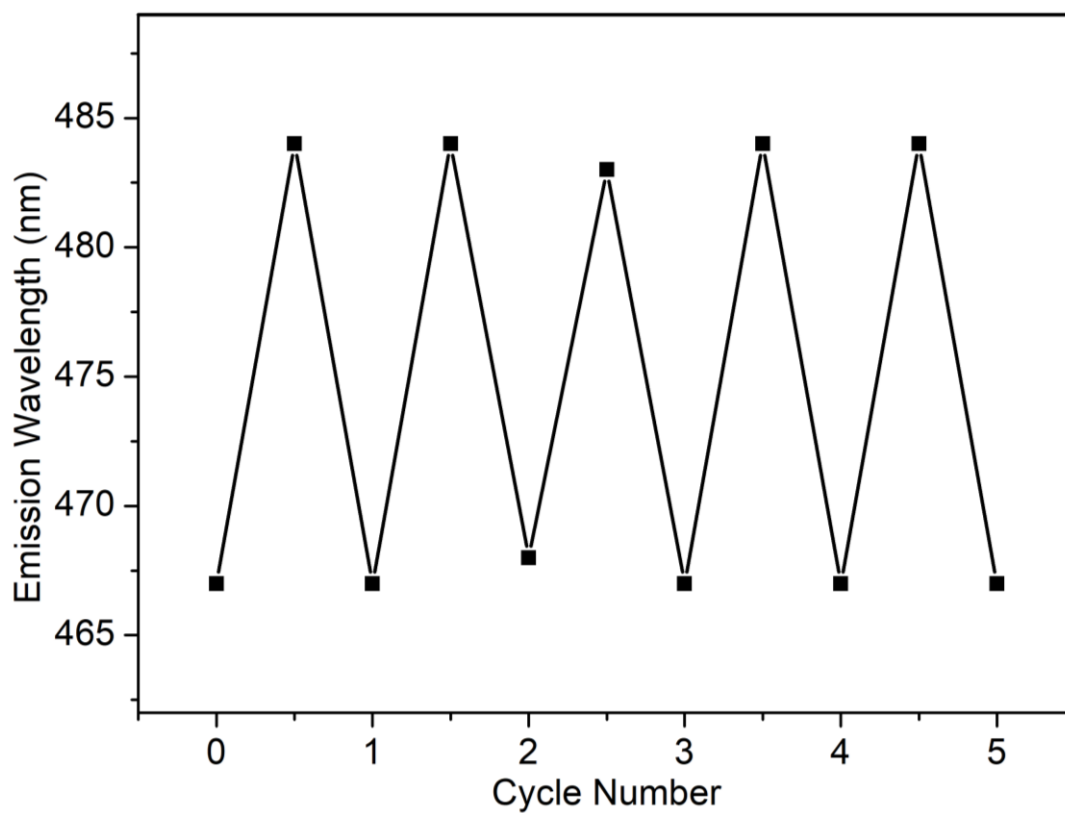

**Fig. S6** Emission maximum variation of **2** under alternate treatment of mechanical grinding and  $\text{CH}_2\text{Cl}_2$  vapor fuming.

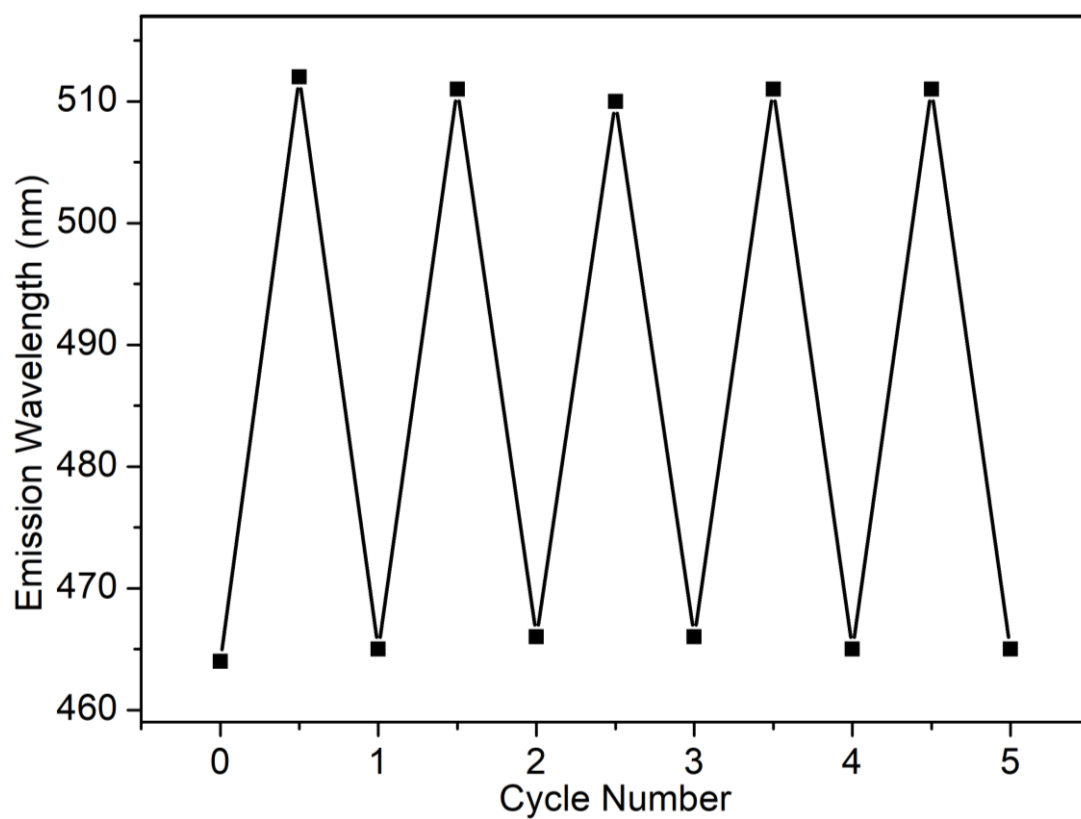

**Fig. S7** Emission maximum variation of **3** under alternate treatment of mechanical grinding and  $\text{CH}_2\text{Cl}_2$  vapor fuming.

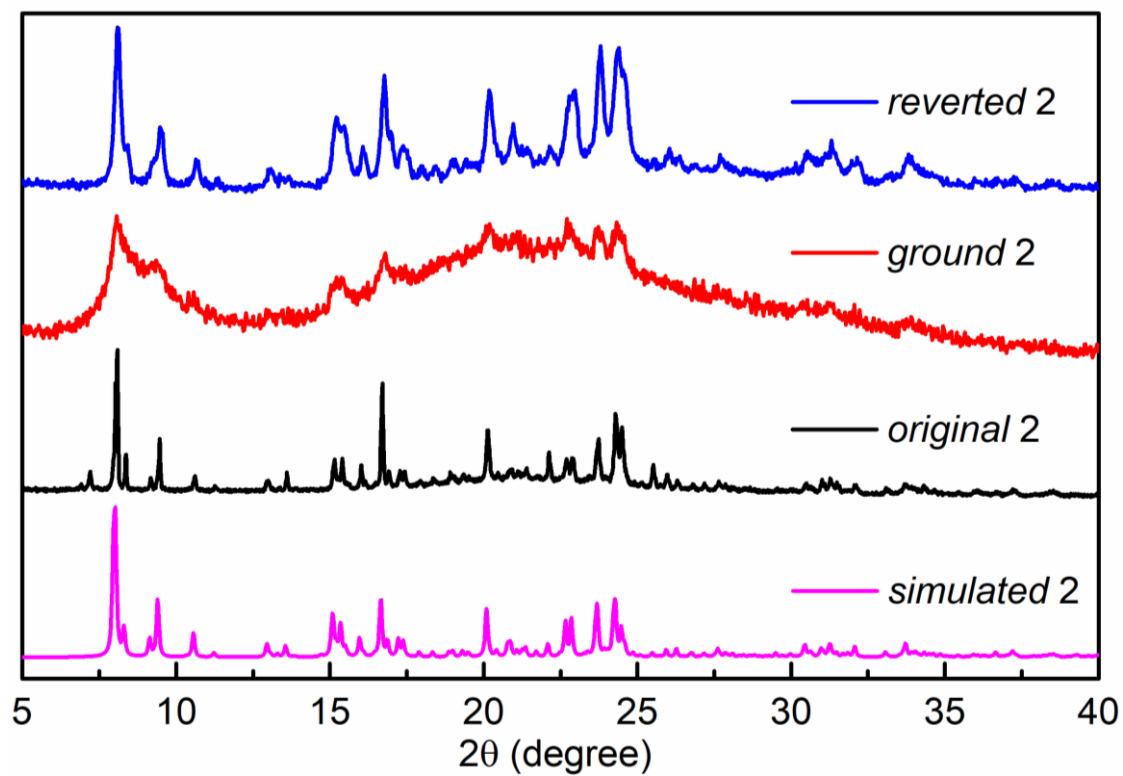

**Fig. S8** PXRD patterns of the *original*, *ground* and *reverted* samples of **2** and that calculated from its single-crystal data of **2**.

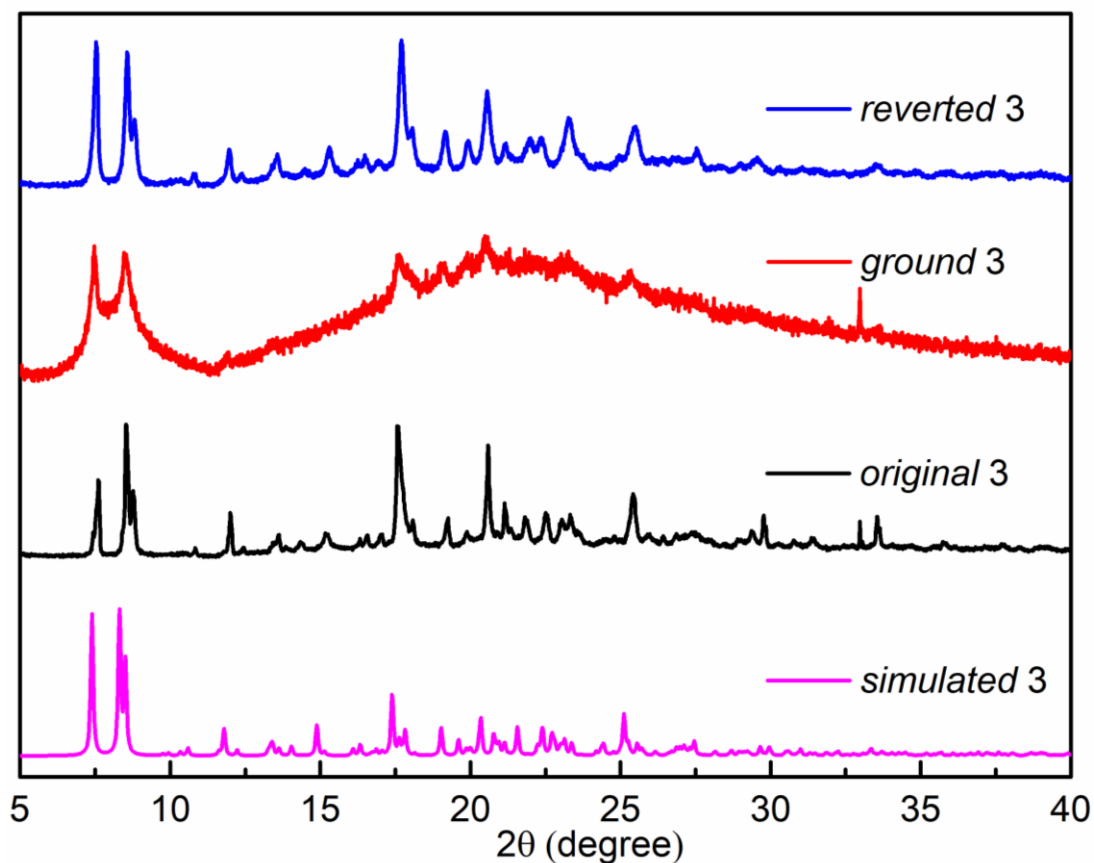

**Fig. S9** PXRD patterns of the *original*, *ground* and *reverted* samples of **3** and that calculated from its single-crystal data of **3**.

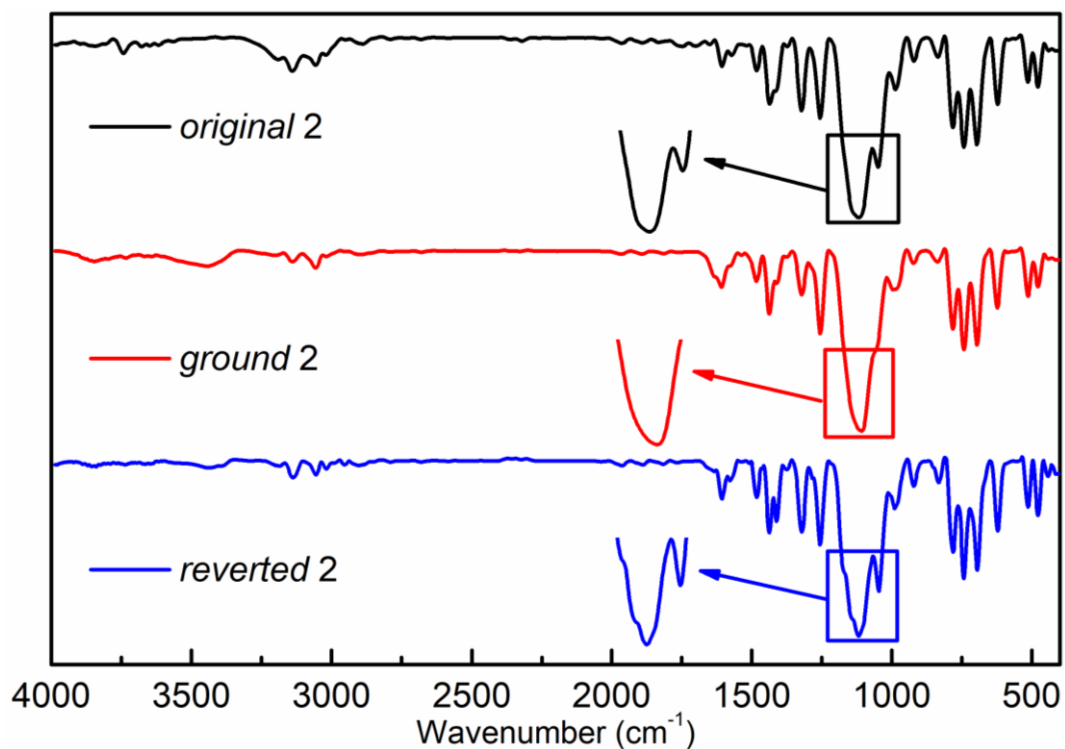

**Fig. S10** FT-IR spectra of the *original*, *ground* and *reverted* samples of **2**. Inset: the zoom of the Cl-O stretching vibration peaks of the *original*, *ground* and *reverted* samples of **2**.



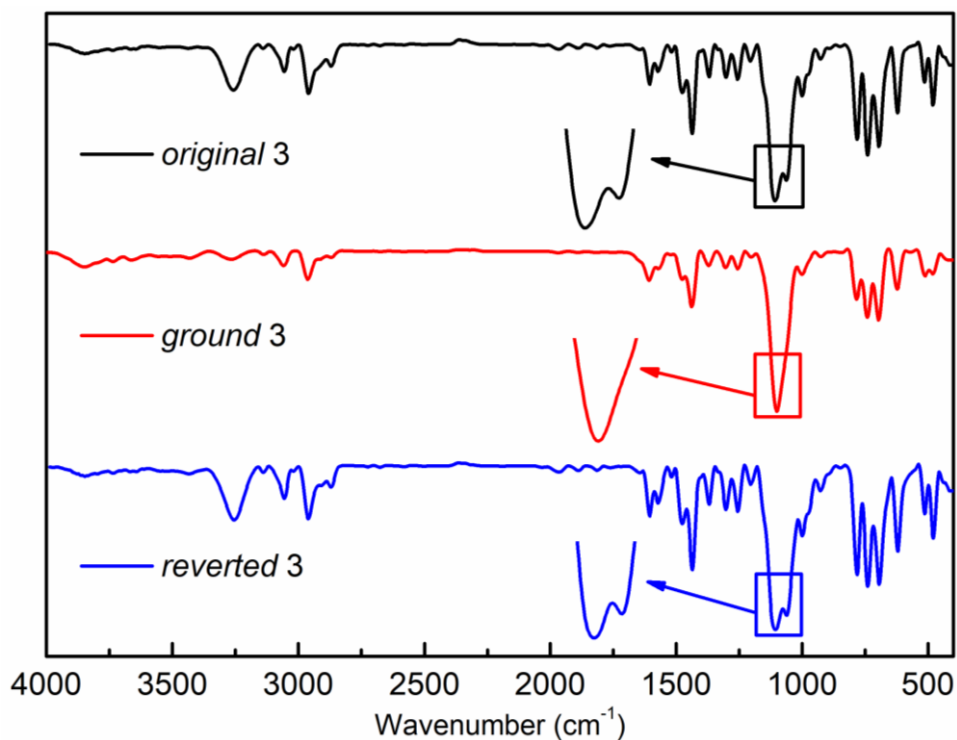

**Fig. S11** FT-IR spectra of the *original*, *ground* and *reverted* samples of **3**. Inset: the zoom of the Cl-O stretching vibration peaks of the *original*, *ground* and *reverted* samples of **3**.

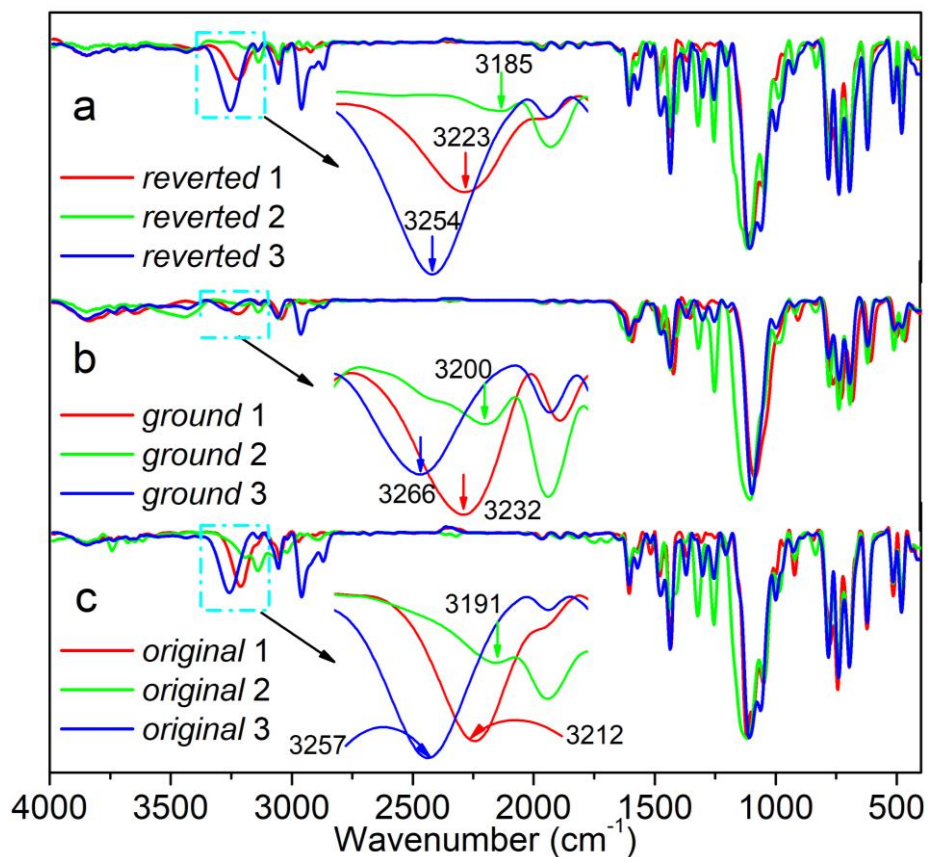

**Fig. S12** FT-IR spectra of the *original*, *ground* and *reverted* samples of **1-3** (a-c). Inset: the zoom of FT-IR spectra of **1-3** at 3350-3100  $\text{cm}^{-1}$ .

**Table S1** Crystal data and structure refinement parameters of **1–3**.

| compound                                    | <b>1</b>                                                                                                     | <b>2</b>                                                                                                                    | <b>3</b>                                                                                                     |
|---------------------------------------------|--------------------------------------------------------------------------------------------------------------|-----------------------------------------------------------------------------------------------------------------------------|--------------------------------------------------------------------------------------------------------------|
| formula                                     | C <sub>68</sub> H <sub>62</sub> Cl <sub>6</sub> Cu <sub>2</sub> N <sub>6</sub> O <sub>8</sub> P <sub>4</sub> | C <sub>68</sub> H <sub>56</sub> Cl <sub>2</sub> Cu <sub>2</sub> F <sub>6</sub> N <sub>6</sub> O <sub>8</sub> P <sub>4</sub> | C <sub>80</sub> H <sub>88</sub> Cl <sub>2</sub> Cu <sub>2</sub> N <sub>6</sub> O <sub>8</sub> P <sub>4</sub> |
| fw                                          | 1554.89                                                                                                      | 1521.04                                                                                                                     | 1583.42                                                                                                      |
| <i>T</i> (K)                                | 304.90(10)                                                                                                   | 293(2)                                                                                                                      | 298.15                                                                                                       |
| crystal system                              | Monoclinic                                                                                                   | Monoclinic                                                                                                                  | Monoclinic                                                                                                   |
| space group                                 | <i>P</i> 2 <sub>1</sub> / <i>c</i>                                                                           | <i>P</i> 2 <sub>1</sub> / <i>c</i>                                                                                          | <i>P</i> 2 <sub>1</sub> / <i>c</i>                                                                           |
| <i>a</i> (Å)                                | 14.1916(4)                                                                                                   | 13.0616(5)                                                                                                                  | 13.5675(9)                                                                                                   |
| <i>b</i> (Å)                                | 13.5140(3)                                                                                                   | 13.5475(5)                                                                                                                  | 17.0941(11)                                                                                                  |
| <i>c</i> (Å)                                | 19.5634(6)                                                                                                   | 19.3487(7)                                                                                                                  | 16.6948(11)                                                                                                  |
| <i>α</i> (deg)                              | 90                                                                                                           | 90                                                                                                                          | 90                                                                                                           |
| <i>β</i> (deg)                              | 108.384(3)                                                                                                   | 92.0960(10)                                                                                                                 | 91.593(2)                                                                                                    |
| <i>γ</i> (deg)                              | 90                                                                                                           | 90                                                                                                                          | 90                                                                                                           |
| <i>V</i> (Å <sup>3</sup> )                  | 3560.49(19)                                                                                                  | 3421.5(2)                                                                                                                   | 3870.4(4)                                                                                                    |
| <i>Z</i>                                    | 2                                                                                                            | 2                                                                                                                           | 2                                                                                                            |
| $\rho_{\text{calcd}}$ (g cm <sup>-3</sup> ) | 1.450                                                                                                        | 1.476                                                                                                                       | 1.359                                                                                                        |
| $\mu$ (mm <sup>-1</sup> )                   | 0.970                                                                                                        | 0.869                                                                                                                       | 0.760                                                                                                        |
| no. reflections collected                   | 36101                                                                                                        | 51467                                                                                                                       | 58224                                                                                                        |
| no. unique reflections                      | 9804                                                                                                         | 7846                                                                                                                        | 8884                                                                                                         |
| <i>R</i> <sub>int</sub>                     | 0.0365                                                                                                       | 0.0390                                                                                                                      | 0.0537                                                                                                       |
| no. observed reflections                    | 9804                                                                                                         | 7846                                                                                                                        | 8884                                                                                                         |
| no. parameters                              | 428                                                                                                          | 433                                                                                                                         | 492                                                                                                          |
| GOF on <i>F</i> <sup>2</sup>                | 1.068                                                                                                        | 1.057                                                                                                                       | 1.048                                                                                                        |
| <i>R</i> 1 [ <i>I</i> > 2σ( <i>I</i> )]     | 0.0540                                                                                                       | 0.0535                                                                                                                      | 0.0554                                                                                                       |
| <i>wR</i> 2                                 | 0.1538                                                                                                       | 0.1366                                                                                                                      | 0.1376                                                                                                       |

**Table S2** Selected bond lengths (Å) and angles (deg) of **1–3**.

| compound  | <b>1</b>  | <b>2</b>  | <b>3</b>  |
|-----------|-----------|-----------|-----------|
| Cu1–N1    | 2.158(2)  | 2.167(3)  | 2.171(3)  |
| Cu1–N2    | 2.086(2)  | 2.111(3)  | 2.092(3)  |
| Cu1–P1    | 2.2694(7) | 2.2547(9) | 2.2419(9) |
| Cu1–P2    | 2.2294(7) | 2.2305(8) | 2.2485(9) |
| N1–Cu1–N2 | 77.74(9)  | 77.37(12) | 77.73(11) |
| N1–Cu1–P1 | 102.62(6) | 98.53(8)  | 102.76(8) |
| N1–Cu1–P2 | 104.59(6) | 104.47(8) | 99.58(8)  |
| N2–Cu1–P1 | 100.62(6) | 101.47(8) | 112.67(8) |
| N2–Cu1–P2 | 120.10(7) | 117.28(8) | 105.83(8) |
| P1–Cu1–P2 | 134.68(3) | 138.17(3) | 138.62(3) |
